# Supplementary material for: miR-125a-5p inhibits tumorigenesis in hepatocellular carcinoma
Source: publisher site journal article supplement (doi:10.18632/aging.102276), 2019-09-17
Supplement: Supplementary file [file aging-v11i18-102276-supplementary-material-SD2.pdf]

## SUPPLEMENTARY TABLES

**Supplementary Table 1. Differentially expressed miRNAs with Fold change, P value, and FDR.**

| <b>Gene</b>  | <b>Fold change</b> | <b>P value</b> | <b>FDR</b> |
|--------------|--------------------|----------------|------------|
| miR-98       | 2.024689           | 0.0014         | 0.007467   |
| miR-215      | 2.751503           | 0.0059         | 0.00651    |
| miR-101-3p   | 2.880401           | 0.0084         | 0.008671   |
| miR-106a-5p  | 4.005514           | 0.001          | 0.016      |
| miR-125a-3p  | 5.775092           | 0.0086         | 0.0086     |
| miR-125b-5p  | 2.875402           | 0.0015         | 0.006857   |
| miR-125a-5p  | 9.646382           | 0.0001         | 0.0032     |
| miR-126-3p   | 3.00155            | 0.001          | 0.016      |
| miR-127-5p   | 3.342685           | 0.0015         | 0.006857   |
| miR-129-2-3p | 2.735577           | 0.0031         | 0.005221   |
| miR-139-5p   | 2.772898           | 0.0024         | 0.00512    |
| miR-141-3p   | 4.608696           | 0.0036         | 0.005236   |
| miR-142-5p   | 3.755943           | 0.0033         | 0.00528    |
| miR-146a-5p  | 2.705622           | 0.0031         | 0.005221   |
| miR-15a-5p   | 4.804255           | 0.0034         | 0.005181   |
| miR-181a-5p  | 2.602305           | 0.0024         | 0.00512    |
| miR-181c-3p  | 3.966543           | 0.0019         | 0.005527   |
| miR-186-5p   | 4.123004           | 0.0023         | 0.005257   |
| miR-199a-5p  | 2.33565            | 0.0037         | 0.005148   |
| miR-19b-3p   | 3.619808           | 0.0049         | 0.006272   |
| miR-200a-3p  | 2.804085           | 0.0029         | 0.005459   |
| miR-200b-3p  | 3.830888           | 0.0038         | 0.005067   |
| miR-216a     | 3.838346           | 0.0013         | 0.00832    |
| miR-216b     | 2.716851           | 0.0036         | 0.005236   |
| miR-219-1-3p | 3.890149           | 0.0012         | 0.0096     |
| miR-223-3p   | 2.135747           | 0.002          | 0.005333   |
| miR-22-3p    | 2.592771           | 0.0016         | 0.0064     |
| miR-26a-5p   | 2.179431           | 0.0057         | 0.006514   |
| miR-26b-5p   | 2.816377           | 0.0011         | 0.011733   |
| miR-27a-3p   | 2.118625           | 0.005          | 0.006154   |
| miR-301a-3p  | 2.61157            | 0.0034         | 0.005181   |
| miR-30a-5p   | 2.03727            | 0.0051         | 0.006044   |
| miR-30c-5p   | 2.9511             | 0.0001         | 0.0032     |
| miR-30e-5p   | 2.29               | 0.001          | 0.016      |
| miR-31-5p    | 2.004115           | 0.0012         | 0.0096     |
| miR-320c     | 2.351724           | 0.0011         | 0.011733   |
| miR-320e     | 2.490741           | 0.0013         | 0.00832    |
| miR-324-5p   | 2.180824           | 0.0017         | 0.006044   |
| miR-338-5p   | 2.011732           | 0.002          | 0.005333   |
| miR-34a-5p   | 2.067332           | 0.0016         | 0.0064     |
| miR-500a-3p  | 2.001572           | 0.0015         | 0.006857   |
| miR-9-3p     | 3.197425           | 0.0012         | 0.0096     |
| miR-96-5p    | 2.000000           | 0.0016         | 0.0064     |
| miR-374a-5p  | 2.53286            | 0.0024         | 0.00512    |
| miR-21-5p    | 2.28769            | 0.0018         | 0.00576    |
| miR-17-3p    | 2.081494           | 0.003          | 0.005333   |
| miR-17-5p    | 2.179357           | 0.0016         | 0.0064     |
| miR-301b     | 2.169048           | 0.005          | 0.006154   |
| miR-495-3p   | 2.012968           | 0.0015         | 0.006857   |
| miR-18a-5p   | 2.107143           | 0.0082         | 0.008747   |
| miR-561-5p   | 2.818947           | 0.0018         | 0.00576    |
| miR-423-5p   | 2.883028           | 0.0025         | 0.005      |
| miR-539-3p   | 2.389985           | 0.0017         | 0.006044   |
| miR-330-5p   | 2.693243           | 0.0025         | 0.005      |
| miR-148b-3p  | 2.508993           | 0.0012         | 0.0096     |
| miR-541-3p   | 2.358318           | 0.0011         | 0.011733   |

|            |          |        |          |
|------------|----------|--------|----------|
| miR-379-3p | 2.553738 | 0.0014 | 0.007467 |
| miR-382-5p | 2.569558 | 0.001  | 0.016    |
| miR-411-3p | 2.90303  | 0.0018 | 0.00576  |
| miR-654-5p | 3.112903 | 0.0012 | 0.0096   |
| miR-296-5p | 3.529891 | 0.0015 | 0.006857 |
| miR-524-5p | 3.385475 | 0.0021 | 0.005169 |
| miR-494-3p | 2.635294 | 0.0015 | 0.006857 |
| miR-137    | 2.933628 | 0.0029 | 0.005459 |

**Supplementary Table 2. 131 common elements identified in the DIANA-microT miRDB and TargetScan databases.**

|          |          |         |          |          |
|----------|----------|---------|----------|----------|
| TRIM71   | SLITRK6  | TAF9B   | SULT4A1  | MAMDC2   |
| PCTP     | LIN28A   | GGT7    | CDC42BPG | DENND6A  |
| KIAA1522 | SMG1     | LRP4    | PTPN1    | BMPR1B   |
| ENPEP    | SLC39A9  | PTPN18  | LCOR     | SUV420H2 |
| MFHAS1   | SEMA4F   | RYBP    | ABCC5    | REST     |
| LFNG     | MAP3K9   | HIF1AN  | TMEM120B | TAZ      |
| SEMA4D   | EVA1A    | RNF168  | TP53INP1 | SLC6A17  |
| FUT4     | NIPAL4   | MBD1    | NECAB3   | WIPF2    |
| MYT1     | CORO2A   | BDH1    | KCTD15   | TXNRD1   |
| ZSWIM6   | CCNJ     | RFXANK  | PSMB8    | CBX7     |
| SLC46A3  | SBNO1    | KHNYN   | PHC2     | FAM134C  |
| CRB2     | CYP24A1  | TNFSF4  | DICER1   | SLC4A10  |
| ZSCAN29  | IRF4     | SCARB2  | PPME1    | C17orf59 |
| MAP3K11  | SYVN1    | GRB10   | BCAT1    | LIPA     |
| RAPGEF5  | ETV6     | ZNF385A | EIF1AD   | KLHL24   |
| FAM169B  | KIAA1841 | BMF     | SLC38A9  | GTPBP2   |
| FBXW4    | PPAT     | ZNF691  | ZNRF3    | PCSK7    |
| KLF13    | IL16     | MFN1    | KCNH7    | KCNA1    |
| ABHD6    | SEMA4C   | THEMIS2 | ABL2     | EDEM1    |
| GCNT1    | SAMD10   | CDR2L   | USP37    | GGA2     |
| MCL1     | KCNS3    | MAP3K10 | PCGF6    | IST1     |
| ESRRA    | RHOQ     | ZC3H7B  | ELOVL6   | RREB1    |
| LBH      | TRPS1    | TLE3    | HNRNPUL2 | FAM53C   |
| LRFN2    | KLHL6    | SH3BP5L | NT5DC1   | CGN      |
| WARS     | SLC7A1   | ST6GAL1 | TMEM136  | MLF2     |
| TGOLN2   | IER3IP1  | ITGA9   | USP46    | LIN28B   |
| DAAM1    |          |         |          |          |

**Supplementary Table 3. Correlations between PTPN1 and MAP3K11 protein expression and clinicopathologic features.**

| Feature | Number<br>(n=120) | PTPN1 expression |        |      | P value | MAP3K11 expression |        |      | P value |
|---------|-------------------|------------------|--------|------|---------|--------------------|--------|------|---------|
|         |                   | Low              | Medium | High |         | Low                | Medium | High |         |
| Ages    |                   |                  |        |      |         |                    |        |      |         |
| ≥60     | 26                | 11               | 10     | 5    | 0.064   | 7                  | 9      | 10   | 0.142   |
| <60     | 94                | 23               | 40     | 31   |         | 13                 | 43     | 38   |         |
| Gender  |                   |                  |        |      |         |                    |        |      |         |
| Male    | 94                | 26               | 40     | 28   | 0.902   | 8                  | 43     | 38   | 0.231   |
| Female  | 26                | 8                | 10     | 8    |         | 7                  | 9      | 10   |         |
| Grade   |                   |                  |        |      |         |                    |        |      |         |
| 1       | 12                | 4                | 2      | 6    | 0.835   | 5                  | 1      | 6    | 0.552   |
| 2       | 104               | 28               | 47     | 29   |         | 11                 | 51     | 40   |         |
| 3       | 4                 | 2                | 1      | 1    |         | 1                  | 1      | 2    |         |
| Stage   |                   |                  |        |      |         |                    |        |      |         |
| I       | 6                 | 4                | 1      | 1    | 0.008   | 3                  | 2      | 1    | 0.025   |
| II      | 42                | 21               | 11     | 10   |         | 10                 | 21     | 11   |         |
| III     | 72                | 9                | 38     | 25   |         | 7                  | 29     | 36   |         |

**Supplementary Table 4. PTPN1 expression in HCC and normal liver tissues.**

|        | Number | Low | Medium | High | P value |
|--------|--------|-----|--------|------|---------|
| Normal | n=10   | 7   | 2      | 1    | 0.0152  |
| HCC    | n=120  | 34  | 50     | 36   |         |

**Supplementary Table 5. MAP3K11 expression in HCC and normal liver tissues.**

|        | Number | Low | Medium | High | P value |
|--------|--------|-----|--------|------|---------|
| Normal | n=10   | 5   | 3      | 2    | 0.0382  |
| HCC    | n=120  | 20  | 52     | 48   |         |

**Supplementary Table 6. Primers used in the qRT-PCR reactions.**

| Gene              | Sequence (5'—3')                                    |
|-------------------|-----------------------------------------------------|
| miR-125a-5p-RT    | GTCGTATCCAGTGCAGGGTCCGAGGTATTCGCACTGGATACGACTCACAGG |
| miR-125a-5p-F     | ACACTCCAGCTGGGTCCCTGAGACCCTTTAAC                    |
| miRNA universal-R | GTGCAGGGTCCGAGGT                                    |
| U6-F              | CTCGCTTCGGCAGCACA                                   |
| U6-R              | AACGCTTCACGAATTTGCGT                                |
| PTPN1-F           | ACTATACCACATGGCCTGACTT                              |
| PTPN1-R           | GAAGAAGGGTCTTTCTCTTGT                               |
| MAP3K11-F         | CCACCGTGATCTCAAGTCCAAC                              |
| MAP3K11-R         | AGGCCTTGATAACCTCAGGAGC                              |
| GAPDH-F           | GGGTGTGAACCATGAGAAGTATG                             |
| GAPDH-R           | AGTAGAGGCAGGGATGATGTTCT                             |

**Supplementary Table 7. Sequences of mimics, inhibitors, and siRNAs.**

| <b>Name</b>           | <b>Sequence (5'—3')</b>                               |
|-----------------------|-------------------------------------------------------|
| miR-125a-5p mimic     | UCCCUGAGACCCUUUAACCUUGUGA<br>ACAGGUUAAAGGGUCUCAGGGAUU |
| miR-125a-5p inhibitor | UCACAGGUUAAAGGGUCUCAGGGA                              |
| miR-control           | CAGUACUUUUGUGUAGUACAA                                 |
| PTPN1 siRNA 1         | GUCGGAUUAAACUACAUCATT<br>UGAUGUAGUUUAAUCCGACTT        |
| PTPN1 siRNA 2         | GACCCUUCUCCGUUGAUATT<br>UAUCAACGGAAGAAGGGUCTT         |
| PTPN1 siRNA 3         | GAGCCACACAAUGGGAAAUTT<br>AUUCCCAUUGUGUGGCUCTT         |
| MAP3K11 siRNA 1       | GCAUCUCCCGUCCAACUATT<br>CAGUUGGACGGGAAGAUGTT          |
| MAP3K11 siRNA 2       | CCUAUGGCGUAGCUGUUAATT<br>UUAACAGCUACGCCAUAGGTT        |
| MAP3K11 siRNA 3       | CAUGGUACCUGGAUUCAGATT<br>UCUGAAUCCAGGUACCAUGTT        |
